# Supplementary material for: Three-dimensional architectures of spinel-type LiMn2O4 prepared from biomimetic porous carbonates and their application to a cathode for lithium-ion batteries
Source: Royal Society of Chemistry journal article supplement (doi:10.1039/b900397e), 2009-01-01
Supplement: b900397e.pdf [file b900397e.pdf]

## Supplementary data

### **Three-dimensional architectures of spinel-type $\text{LiMn}_2\text{O}_4$ prepared from biomimetic porous carbonates and their application to a cathode for lithium-ion batteries**

Hiroaki Uchiyama<sup>a</sup>, Eiji Hosono<sup>b</sup>, Haoshen Zhou<sup>b\*</sup>, Hiroaki Imai<sup>a\*</sup>

*(a) Department of Applied Chemistry, Faculty of Science and Technology, Keio University, 3-14-1 Hiyoshi, Kohoku-ku, Yokohama 223-8522, Japan*

*(b) Energy Technology Research Institute, National Institute of Advanced Industrial Science and Technology, 1-1-1 Umezono, Tsukuba 305-8568, Japan*

*Fax: +81 45 566 1551; Tel: +81 45 566 1556; E-mail: [hiroaki@applc.keio.ac.jp](mailto:hiroaki@applc.keio.ac.jp) (H. Imai).*

*Fax: +81 29 861 5799; Te.: +81 29 861 5795; E-mail: [hs.zhou@aist.go.jp](mailto:hs.zhou@aist.go.jp) (H. Zhou).*

#### **SI-1. Additional information about the experimental conditions of electrochemical measurements**

The area of working electrodes was ca.  $0.25 \text{ cm}^2$  ( $0.5 \text{ cm} \times 0.5 \text{ cm}$ ) and the mass of the electrodes was ca. 2.5 mg, which corresponded approximately to  $10 \text{ mg/cm}^2$ . The current density was 0.1, 0.2 and 0.5 A/g (1.0, 2.0 and 5.0  $\text{mA/cm}^2$ , respectively). C-rate was ca. 0.68, 1.4 and 3.4 C, respectively (these values were calculated using 148 mAh/g as a theoretical capacity).

**SI-2. Specific surface area of the products**Table S1. Specific surface area of MnCO<sub>3</sub>, Mn<sub>2</sub>O<sub>3</sub> and LiMn<sub>2</sub>O<sub>4</sub>.

| $C_{\text{ag}}$ (wt%) | $S_{\text{BET}}$ (m <sup>2</sup> /g) |                                |                                  |
|-----------------------|--------------------------------------|--------------------------------|----------------------------------|
|                       | MnCO <sub>3</sub>                    | Mn <sub>2</sub> O <sub>3</sub> | LiMn <sub>2</sub> O <sub>4</sub> |
| 0                     | 0.34                                 | 17.7                           | 1.98                             |
| 0.5                   | 0.43                                 | 13.9                           | 1.34                             |
| 4.0                   | 1.40                                 | 36.1                           | 2.71                             |

A highly porous framework of the products prepared at  $C_{\text{ag}} = 4.0$  provided relatively large surface area in all compounds (MnCO<sub>3</sub>, Mn<sub>2</sub>O<sub>3</sub> and LiMn<sub>2</sub>O<sub>4</sub>). On the other hand,  $S_{\text{BET}}$  of Mn<sub>2</sub>O<sub>3</sub> and LiMn<sub>2</sub>O<sub>4</sub> prepared at  $C_{\text{ag}} = 0.5$  was smaller than that at  $C_{\text{ag}} = 0$  in spite of the presence of an agar gel. The low  $S_{\text{BET}}$  value of the product at  $C_{\text{ag}} = 0.5$  could be caused by the size of the secondary particle larger than that of the spherical particles prepared without agar.

**SI-3. Discussion on Li : Mn molar ratios**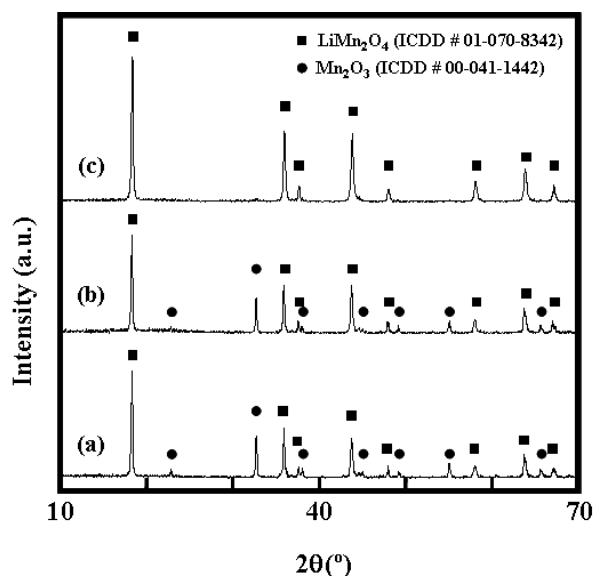

Figure S1. XRD patterns of products reacted with Li<sub>2</sub>CO<sub>3</sub> at Li :Mn = 0.95 : 2 (a), 1 : 2 (b) and 1.05 : 2 (c) ( $C_{ag} = 4.0$  wt%).

Spinel-type LiMn<sub>2</sub>O<sub>4</sub> were prepared by calcination of Mn<sub>2</sub>O<sub>3</sub> as an intermediate phase with Li<sub>2</sub>CO<sub>3</sub>. The intermediates were mixed and then reacted with Li<sub>2</sub>CO<sub>3</sub> at 560°C for 4 h and at 750°C for 20 h. The molar ratio of Li<sub>2</sub>CO<sub>3</sub> : Mn<sub>2</sub>O<sub>3</sub> (Li :Mn) varied in a range between 0.95 : 2 and 1.05 : 2 (The heat treatment process was suggested by Xiang et al.<sup>\*</sup>). Figure S1 shows the XRD patterns of the products. Although Mn<sub>2</sub>O<sub>3</sub> was heated with a stoichiometric amount of Li<sub>2</sub>CO<sub>3</sub> (Li :Mn = 1.00 : 2), a diffraction peak of Mn<sub>2</sub>O<sub>3</sub> was detected. This result could be attributed to a deficiency of lithium due to the partial formation of a nonstoichiometric spinel. The diffraction peak of Mn<sub>2</sub>O<sub>3</sub> in the XRD pattern disappeared and single-phase spinel-type LiMn<sub>2</sub>O<sub>4</sub> were obtained at Li :Mn = 1.05 : 2. In this work, synthesis of spinel-type LiMn<sub>2</sub>O<sub>4</sub> was carried out at Li :Mn = 1.05 : 2 to avoid a residual of Mn<sub>2</sub>O<sub>3</sub>.

\* X. M. He, J. J. Li, Y. Cai, Y. W. Wang, J. R. Ying, C. Y. Jiang, C. R. Wan, *J. Solid State Electrochem.* 2005, **9**, 438.
